# Supplementary material
Source: PubMed Central journal article supplement (PMC7150585)
Supplement: NIHMS1052754-supplement-Supp_info.pdf [file NIHMS1052754-supplement-Supp_info.pdf]

“5HMF Restores Low-Oxygen Rheology of Sickle Trait Blood In Vitro”

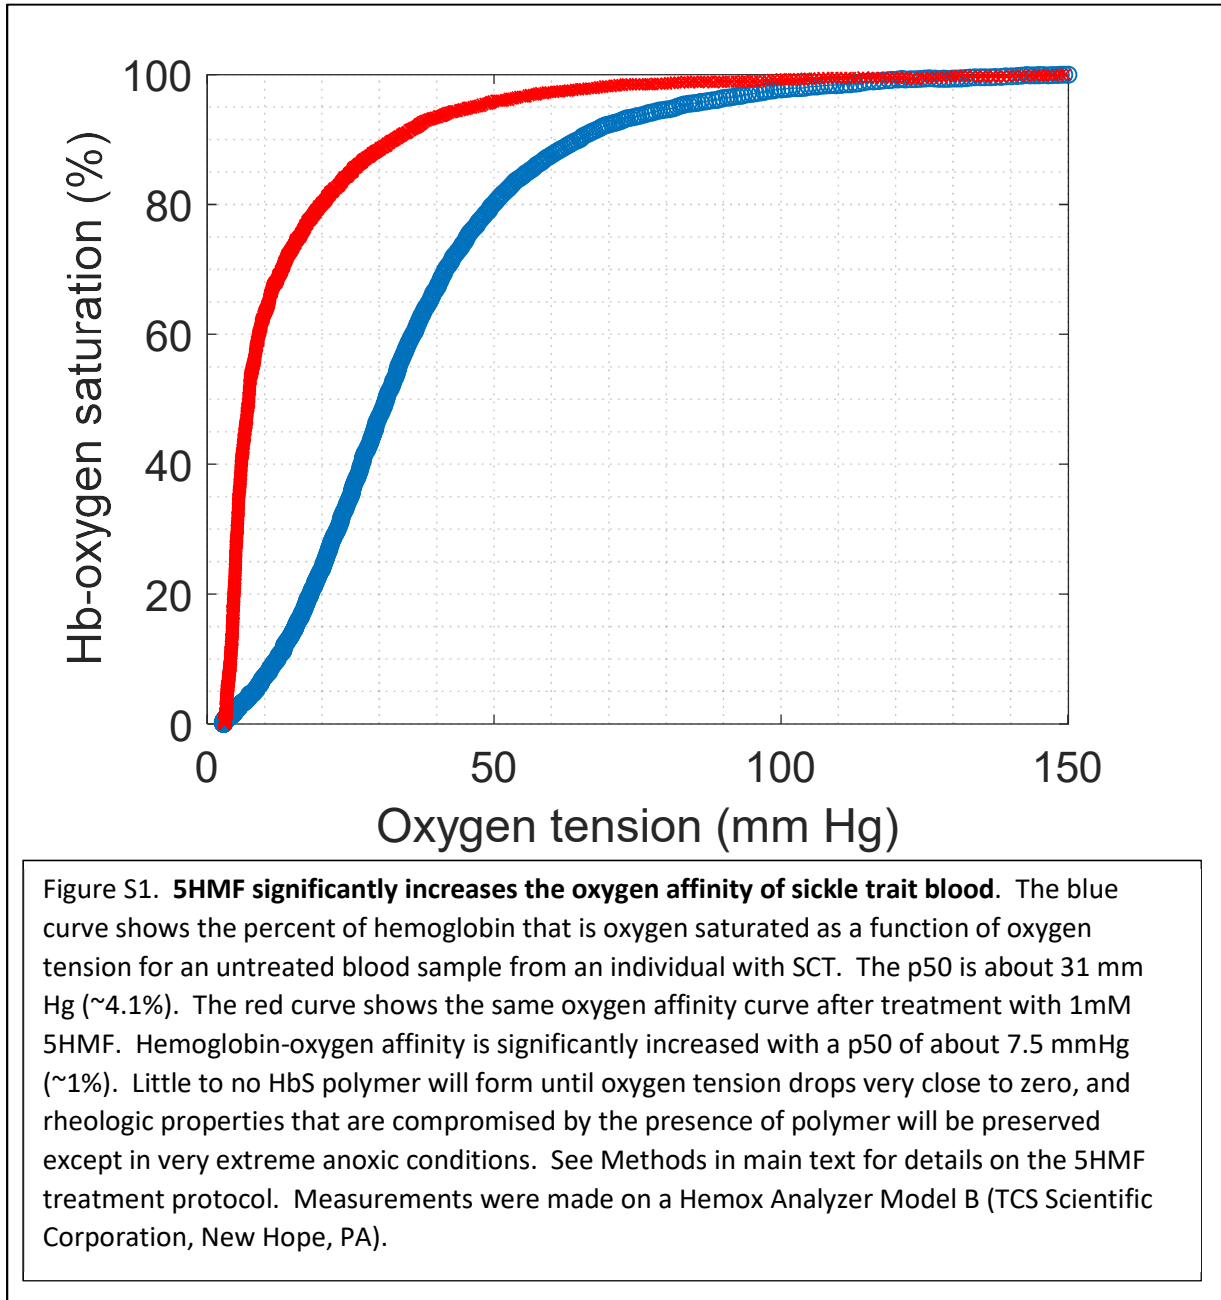

|                                                     | <b>Original</b> | <b>0 mM 5HMF</b> | <b>1 mM 5HMF</b> |
|-----------------------------------------------------|-----------------|------------------|------------------|
| <b>HCT (%)</b>                                      | 31.4            | 25.6             | 26.2             |
| <b>HGB (g/dL)</b>                                   | 10.2            | 7.5              | 7.5              |
| <b>RBC (10<sup>6</sup> cells/<math>\mu</math>L)</b> | 3.4             | 2.59             | 2.63             |
| <b>MCV (fL)</b>                                     | 92.6            | 92.5             | 93.1             |
| <b>MCH (pg)</b>                                     | 30              | 30               | 29.3             |
| <b>MCHC (g/dL)</b>                                  | 32.4            | 32.3             | 31.5             |

**Table S1.** Complete blood count indices for a representative SCT blood sample at baseline (“Original”), following washing and resuspension to a HCT of ~25% without 5HMF (“0 mM 5HMF”) and following washing, resuspension to a HCT of ~25%, and incubation with 1 mM 5HMF (“1 mM 5 HMF”). There were no significant changes in any CBC indices significant enough to influence our results.
